# Supplementary material for: New Antiproliferative Triflavanone from Thymelaea hirsuta—Isolation, Structure Elucidation and Molecular Docking Studies
Source: Molecules. 2021 Jan 31;26(3):739. doi: 10.3390/molecules26030739 (PMC7867015; doi:10.3390/molecules26030739)
Supplement: Supplementary file 1 [file molecules-26-00739-s001.pdf]

# New Antiproliferative Triflavanone from *Thymelaea hirsuta* – Isolation, Structure Elucidation and Molecular Docking Studies

Sameh S. Elhady <sup>1,†</sup>, Reda F. A. Abdelhameed <sup>2,†</sup>, Mayada M. El-Ayouty <sup>2,3</sup>, Amany K. Ibrahim <sup>2</sup>, Eman S. Habib <sup>2</sup>, Mohamed S. Elgawish <sup>4</sup>, Hashim A. Hassanean <sup>2</sup>, Martin K. Safo <sup>5</sup>, Mohamed S. Nafie <sup>6</sup> and Safwat A. Ahmed <sup>2,\*</sup>

<sup>1</sup> Department of Natural Products, Faculty of Pharmacy, King Abdulaziz University, Jeddah 21589, Saudi Arabia; ssahmed@kau.edu.sa (S.S.E.)

<sup>2</sup> Department of Pharmacognosy, Faculty of Pharmacy, Suez Canal University, 41522 Ismailia, Egypt; omarreda\_70@yahoo.com (R.F.A.A.); maya.badawy159@gmail.com (M.M.E.); am\_kamal66@yahoo.com (A.K.I.); emy\_197@hotmail.com (E.S.H.); hashem\_omar@pharm.suez.edu.eg (H.A.H.); safwat\_aa@yahoo.com (S.A.A.)

<sup>3</sup> Department of Pharmacognosy, Faculty of Pharmacy, Sinai University, El-Arish 45511, Egypt

<sup>4</sup> Department of Medicinal Chemistry, Faculty of Pharmacy, Suez Canal University, 41522 Ismailia, Egypt; mohamed\_elgawish@pharm.suez.edu.eg (M.S.E.)

<sup>5</sup> Department of Medicinal Chemistry, School of Pharmacy and Institute for Structural Biology, Drug Discovery and Development, Virginia Commonwealth University, Richmond, VA 23219, USA msafo@vcu.edu (M.K.S.)

<sup>6</sup> Department of Chemistry, Faculty of Science, Suez Canal University, Ismailia 41522, Egypt; mohamed\_nafie@science.suez.edu.eg (M.S.N.)

<sup>†</sup> These authors equally contributed to this work

\* Correspondence: safwat\_aa@yahoo.com (S.A.A.); Tel.: (+20) 010-92638387, Fax: (+20) 064-3230741

## Additional Experimental Detail

- 1) **Figure S1.** LC-MS/MS of compound **1**
- 2) **Figure S2.** <sup>1</sup>H-NMR spectrum of compound **1** (CD<sub>3</sub>OD, 300 MHz)
- 3) **Figure S3.** Partial expansions of the <sup>1</sup>H-NMR spectrum of compound **1** (CD<sub>3</sub>OD, 300 MHz)
- 4) **Figure S4.** Partial expansions of the <sup>1</sup>H-NMR spectrum of compound **1** (CD<sub>3</sub>OD, 300 MHz)
- 5) **Figure S5.** <sup>13</sup>C-NMR spectrum of compound **1** (CD<sub>3</sub>OD, 100 MHz)
- 6) **Figure S6.** 2D-HMBC spectrum of compound **1** (CD<sub>3</sub>OD, 300 MHz)
- 7) **Figure S7.** 2D-HMBC spectrum of compound **1** (CD<sub>3</sub>OD, 300 MHz)
- 8) **Figure S8.** 2D of ligand receptor interaction of MAPK ligand in MAPK active domain (PDB 5EKN) shown hydrogen bonding, hydrophilic and electrostatic interaction
- 9) **Figure S9.** 2D of ligand receptor interaction of compound **6** in MAPK active domain (PDB 5EKN) shown hydrogen bonding, hydrophilic and electrostatic interaction
- 10) **Figure S10.** 2D of ligand receptor interaction of compound **7** in MAPK active domain (PDB 5EKN) shown hydrogen bonding, hydrophilic and electrostatic interaction
- 11) **Figure S11.** 2D of ligand receptor interaction of compound **8** in MAPK active domain (PDB 5EKN) shown hydrogen bonding, hydrophilic and electrostatic interaction
- 12) **Figure S12.** 2D of ligand receptor interaction of Rutin in MAPK active domain (PDB 5EKN) shown hydrogen bonding, hydrophilic and electrostatic interaction
- 13) **Figure S13.** 2D of ligand receptor interaction of Sorafenib in MAPK active domain (PDB 5EKN) shown hydrogen bonding, hydrophilic and electrostatic interaction

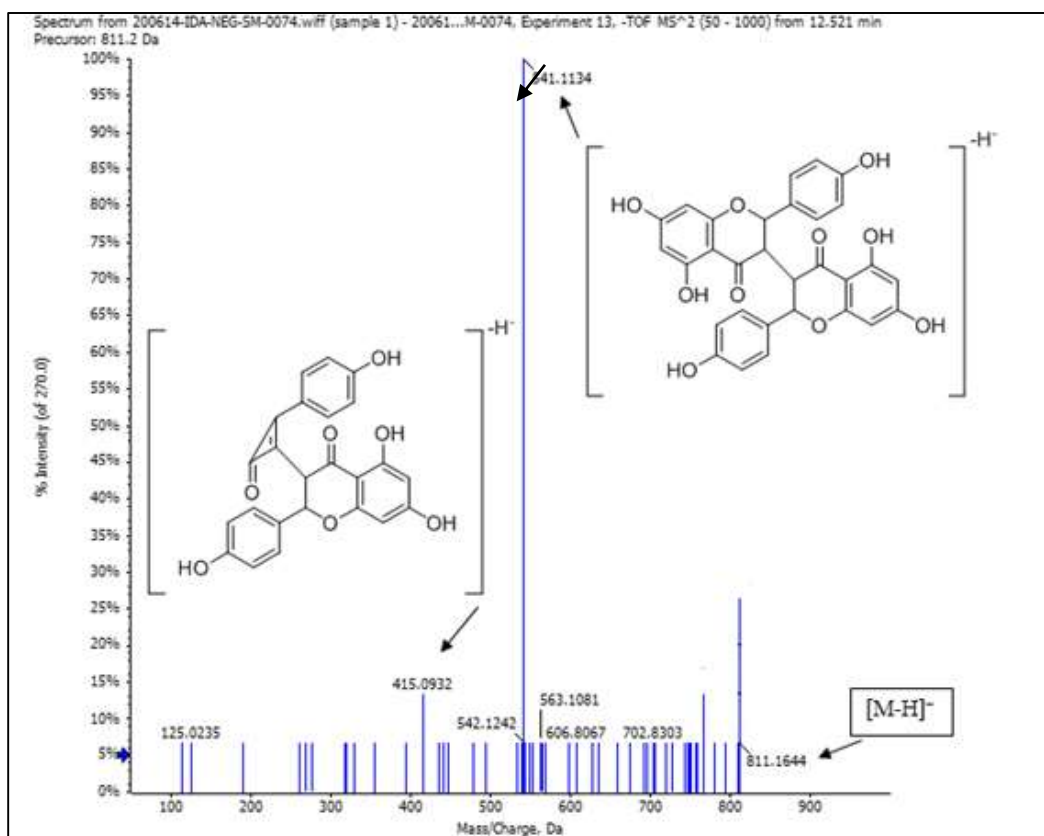

**Figure S1:** LC-MS/MS of compound **1**

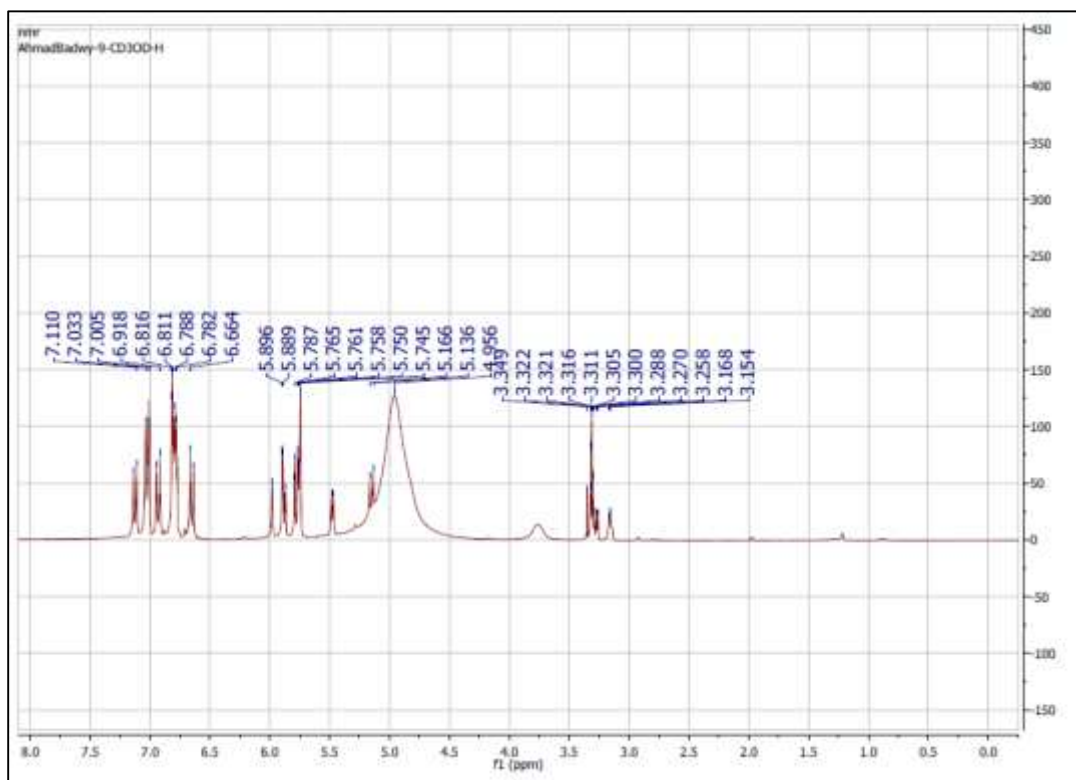

**Figure S2:** <sup>1</sup>H-NMR spectrum of compound **1** (CD<sub>3</sub>OD, 300 MHz)

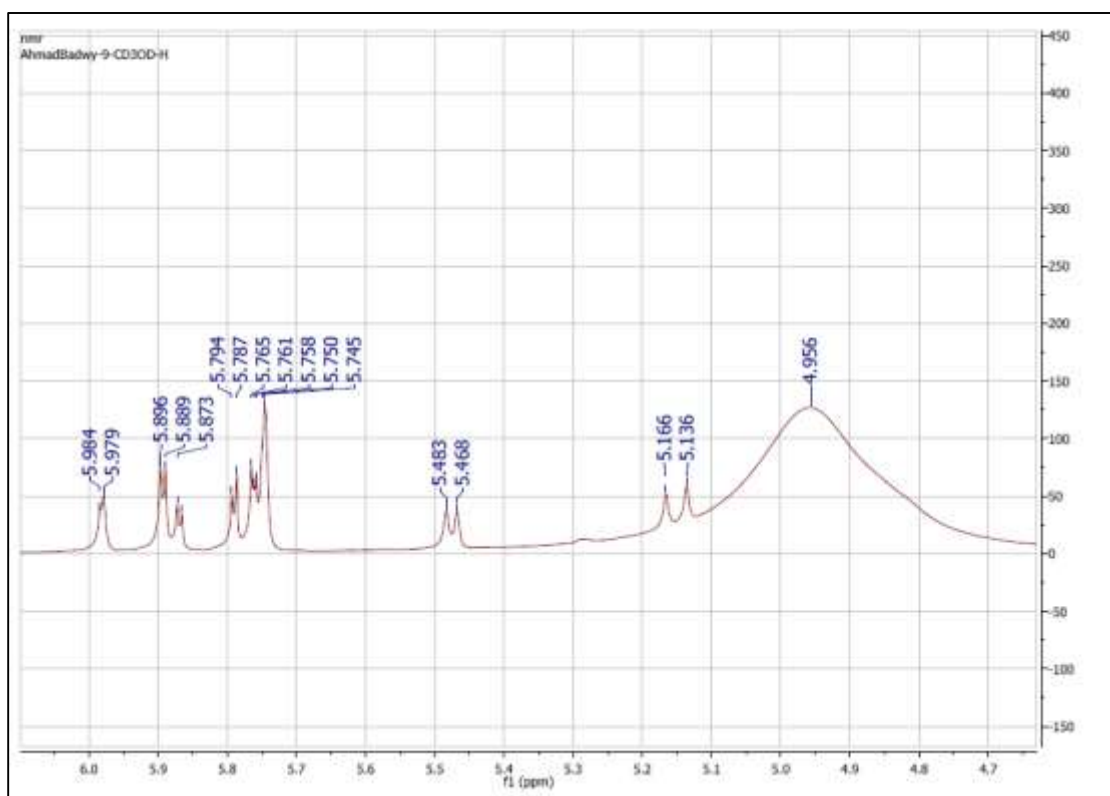

**Figure S3:** Partial expansions of the  $^1\text{H}$ -NMR spectrum of compound **1** ( $\text{CD}_3\text{OD}$ , 300 MHz)

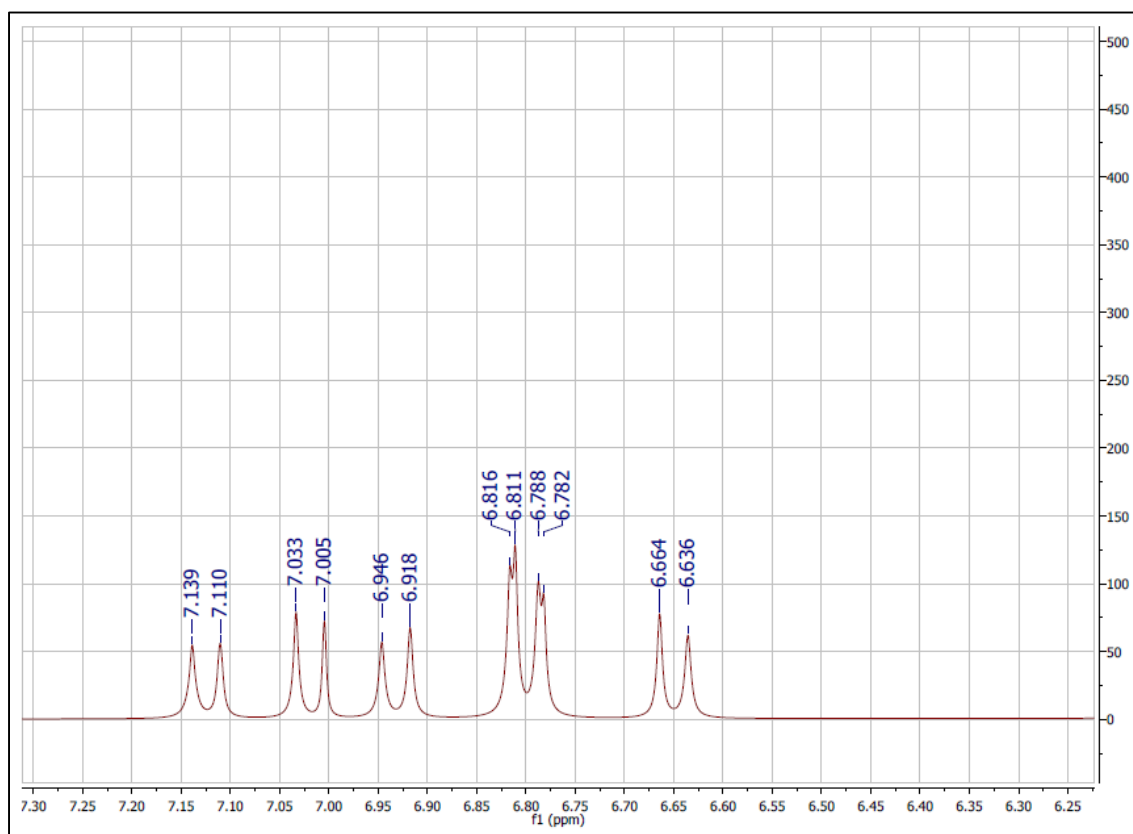

**Figure S4:** Partial expansions of the  $^1\text{H}$ -NMR spectrum of compound **1** in ( $\text{CD}_3\text{OD}$ , 300 MHz)

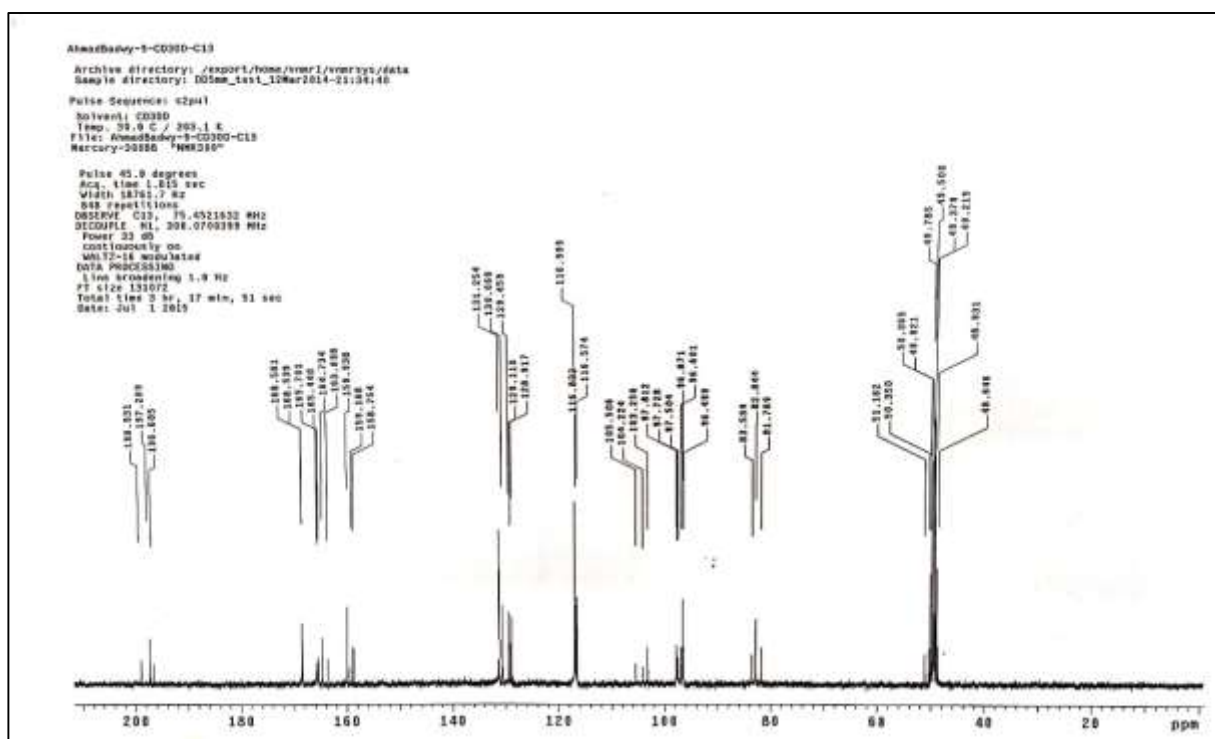

**Figure S5:** <sup>13</sup>C-NMR spectrum of compound **1** in (CD<sub>3</sub>OD, 100 MHz)

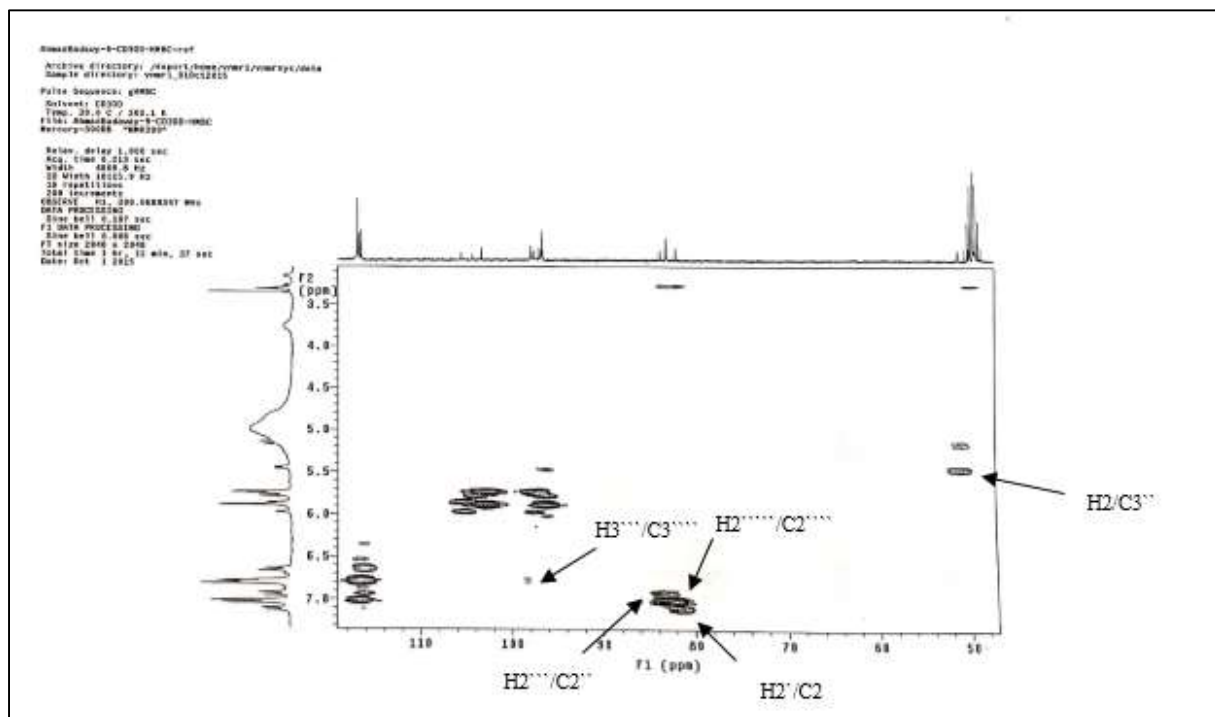

**Figure S6:** 2D-HMBC spectrum of compound **1** in (CD<sub>3</sub>OD, 300 MHz)

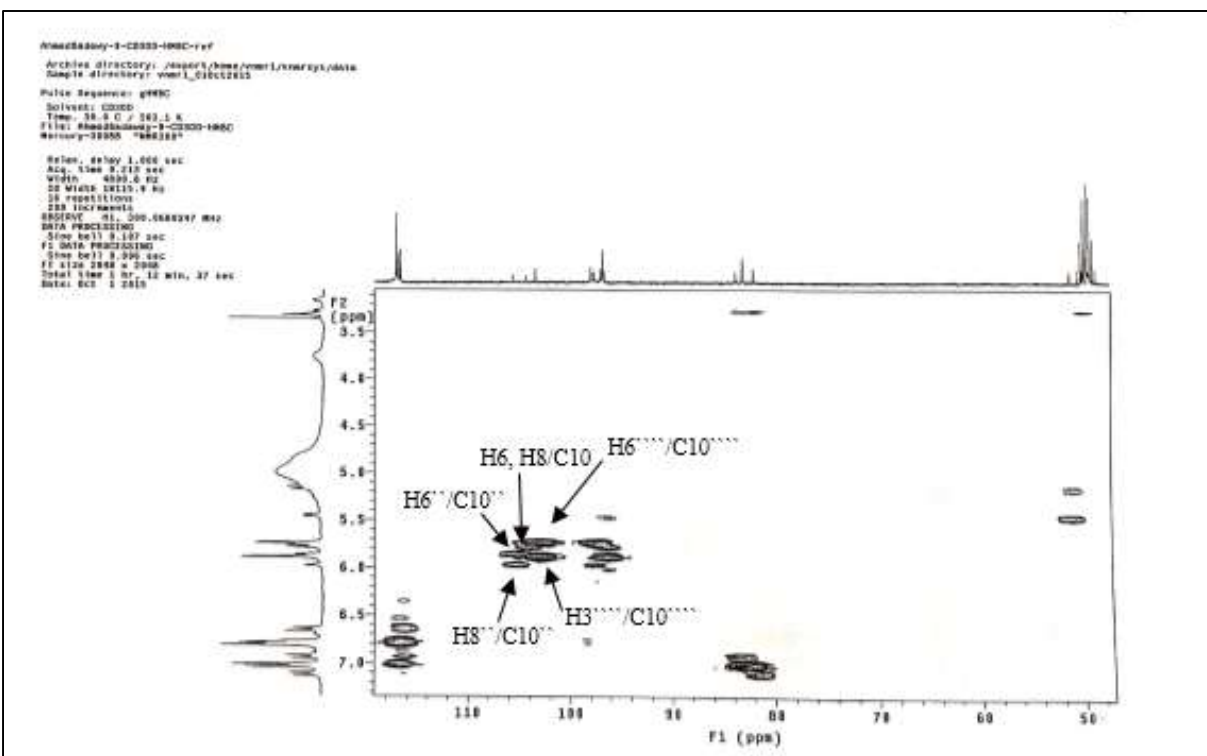

**Figure S7:** 2D-HMBC spectrum of compound **1** in (CD<sub>3</sub>OD, 300 MHz)

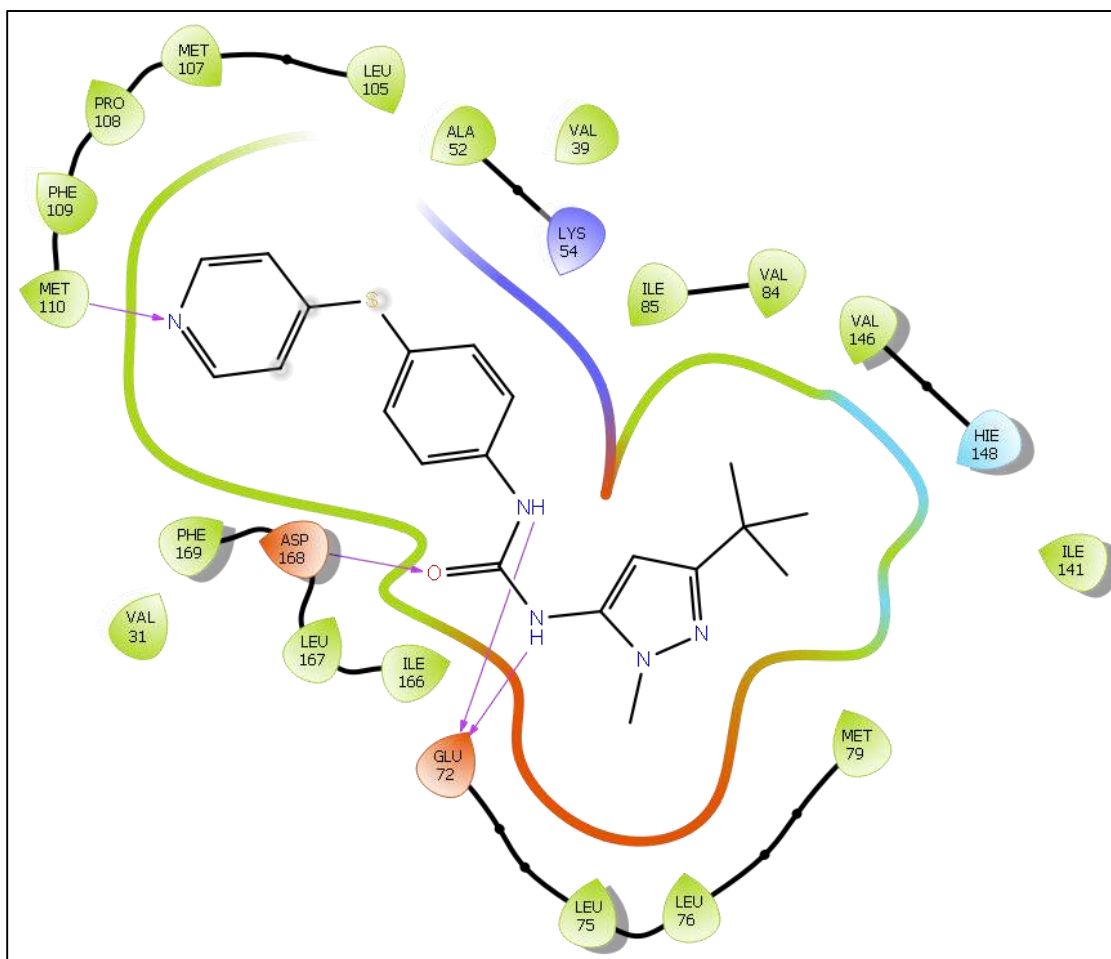

**Figure S8.** 2D of ligand receptor interaction of MAPK ligand in MAPK active domain (PDB 5EKN) shown hydrogen bonding, hydrophilic and electrostatic interaction

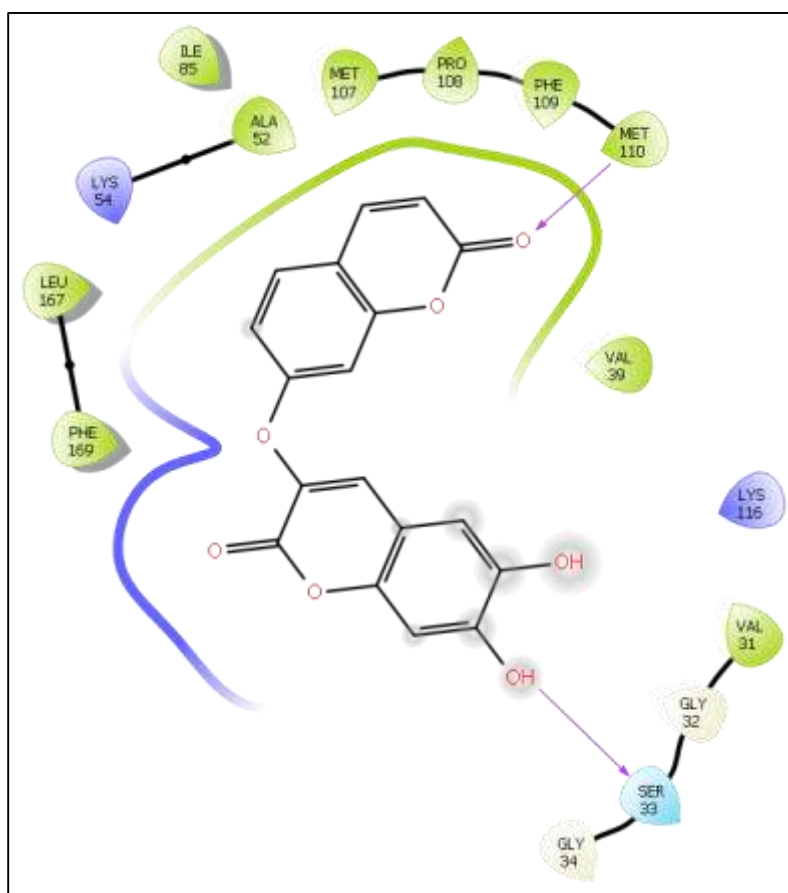

**Figure S9.** 2D of ligand receptor interaction of compound **6** in MAPK active domain (PDB 5EKN) shown hydrogen bonding, hydrophilic and electrostatic interaction

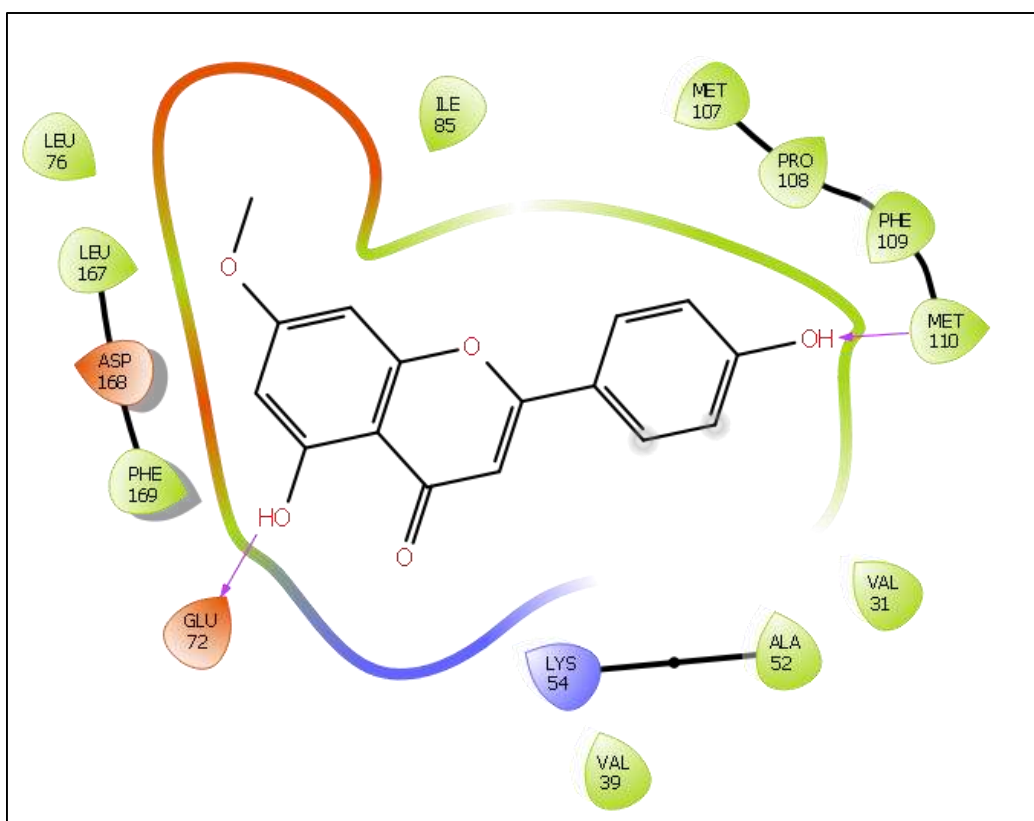

**Figure S10.** 2D of ligand receptor interaction of compound 7 in MAPK active domain (PDB 5EKN) shown hydrogen bonding, hydrophilic and electrostatic interaction

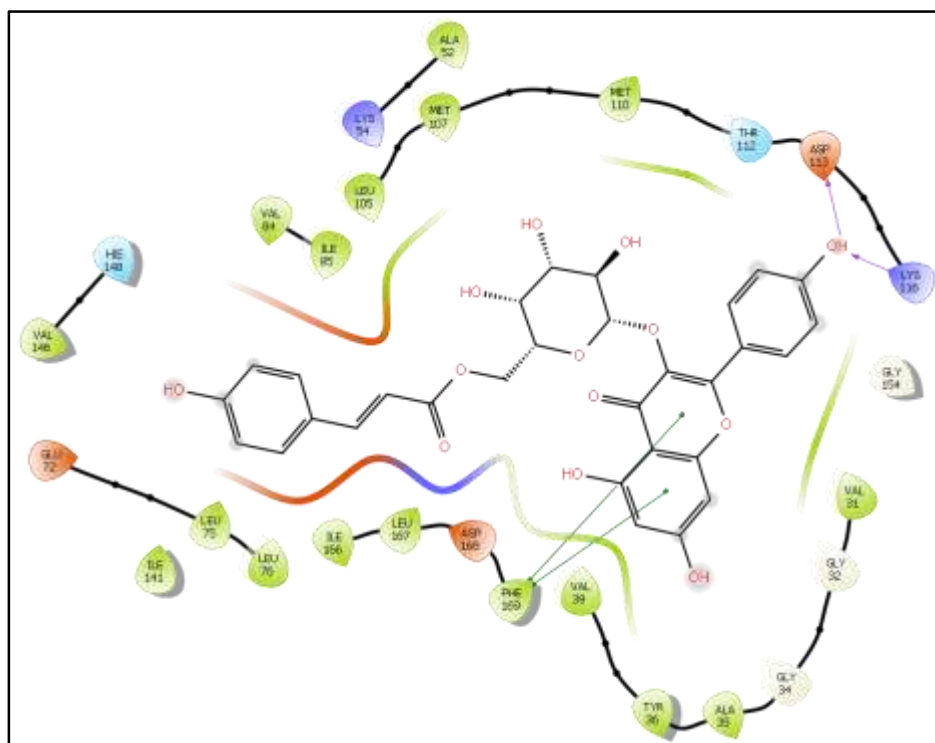

**Figure S11.** 2D of ligand receptor interaction of compound 8 in MAPK active domain (PDB 5EKN) shown hydrogen bonding, hydrophilic and electrostatic interaction

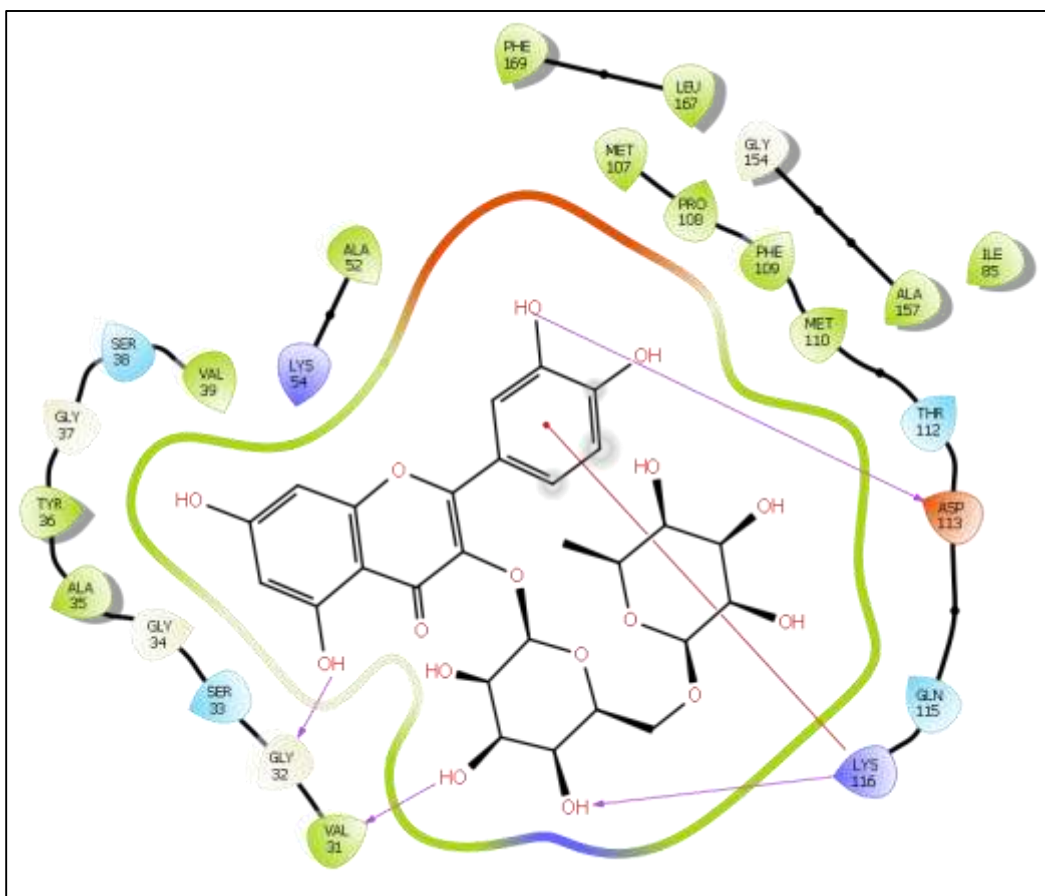

**Figure S12.** 2D of ligand receptor interaction of Rutin in MAPK active domain (PDB 5EKN) shown hydrogen bonding, hydrophilic and electrostatic interaction

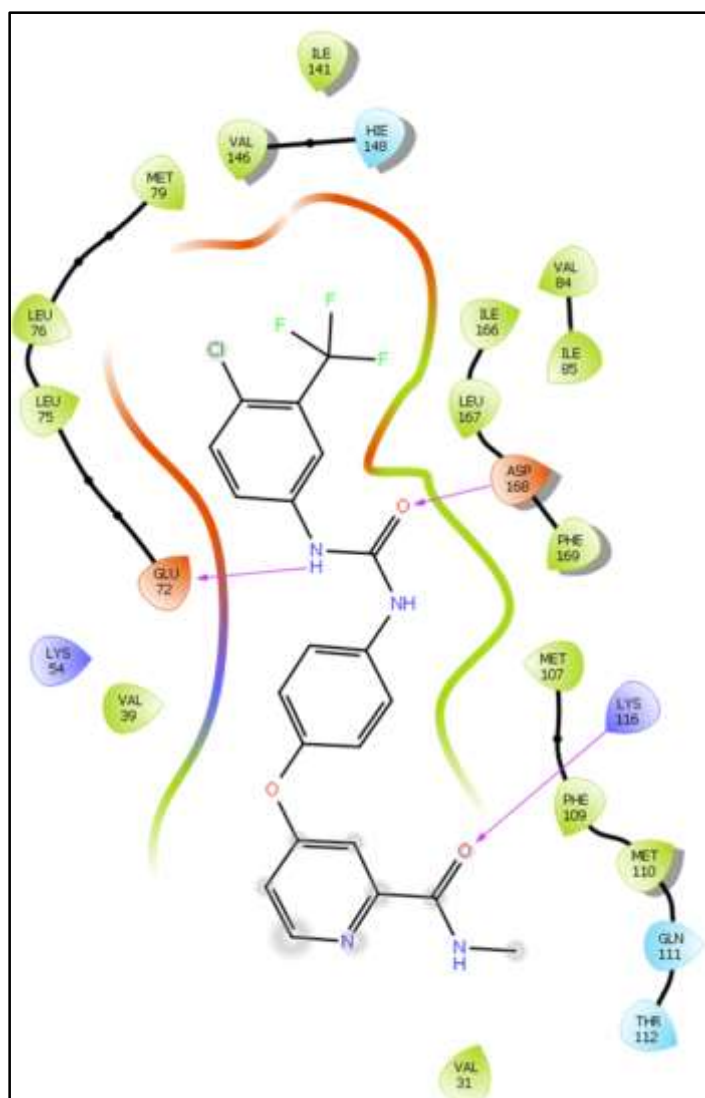

**Figure S13.** 2D of ligand receptor interaction of Sorafenib in MAPK active domain (PDB 5EKN) shown hydrogen bonding, hydrophilic and electrostatic interaction
